# Supplementary material for: Synthesis of New Water Soluble β-Cyclodextrin@Curcumin Conjugates and In Vitro Safety Evaluation in Primary Cultures of Rat Cortical Neurons
Source: PubMed Central journal article supplement (PMC8004725; doi:10.3390/ijms22063255), 2021-03-23
Supplement: ijms-22-03255-s001.pdf [file ijms-22-03255-s001.pdf]

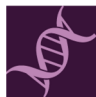

## Supplementary Materials

# Synthesis of new water soluble $\beta$ -Cyclodextrin@Curcumin conjugates and *in vitro* safety evaluation in primary cultures of rat cortical neurons

Amina Ben Mihoub <sup>1,2,3,\*</sup>, Samir Acherar <sup>2,\*</sup>, Céline Frochot <sup>3</sup>, Catherine Malaplate <sup>4</sup>, Frances T. Yen <sup>4</sup>  
and Elmira Arab-Tehrany <sup>1,\*</sup>

<sup>1</sup> LIBio Laboratory, Université de Lorraine, F-54000 Nancy, France

<sup>2</sup> LCPM, CNRS, Université de Lorraine, F-54000 Nancy, France

<sup>3</sup> LRGP, CNRS, Université de Lorraine, F-54000 Nancy, France; [celine.frochot@univ-lorraine.fr](mailto:celine.frochot@univ-lorraine.fr)

<sup>4</sup> URAFPA, INRAE, Université de Lorraine, F-54000 Nancy, France;  
[catherine.malaplate-armand@univ-lorraine.fr](mailto:catherine.malaplate-armand@univ-lorraine.fr) (C.M.); [frances.yen-potin@univ-lorraine.fr](mailto:frances.yen-potin@univ-lorraine.fr) (F.T.Y.)

\* Correspondence: [amina.ben-mihoub@univ-lorraine.fr](mailto:amina.ben-mihoub@univ-lorraine.fr) (A.B.M.); [samir.acherar@univ-lorraine.fr](mailto:samir.acherar@univ-lorraine.fr) (S.A.); [elmira.arab-tehrany@univ-lorraine.fr](mailto:elmira.arab-tehrany@univ-lorraine.fr) (E.A.-T.)

### Table of contents

|                                                                                                                             |     |
|-----------------------------------------------------------------------------------------------------------------------------|-----|
| Characterization of Cur mono-alkyne 1                                                                                       | S-2 |
| Characterization of Cur di-alkyne 2                                                                                         | S-3 |
| 1D and 2D NMR spectra ( <sup>1</sup> H, <sup>13</sup> C, HSQC and HMBC) of $\beta$ -CD@Cur 4 nanoconjugate                  | S-4 |
| 1D and 2D NMR spectra ( <sup>1</sup> H, <sup>13</sup> C, HSQC and HMBC) of ( $\beta$ -CD) <sub>2</sub> @Cur 5 nanoconjugate | S-9 |

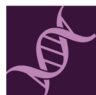

### Characterization of Cur mono-alkyne 1

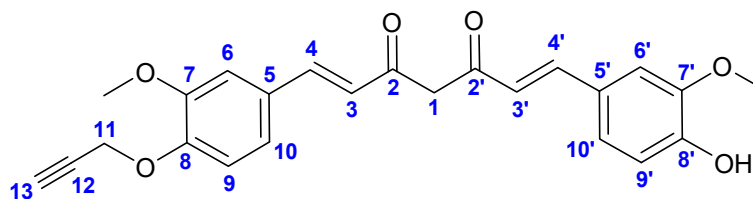

- ✓ **TLC:**  $R_f = 0.63$  (EtOAc/Hexane = 50:50, v/v)
- ✓ **Analytical HPLC:**  $R_t = 12.62$  min (ACN/H<sub>2</sub>O, v/v) gradients from 10/90 to 100/0 in 25 min, then 100/0 for 10 min containing 0.1 % trifluoroacetic acid (TFA). A flow rate of 1.0 mL/min with UV detection at 254 nm and 420 nm.)
- ✓ **<sup>1</sup>H NMR (300 MHz, DMSO-*d*<sub>6</sub>):**  $\delta$  3.59 (t,  $J = 2.1$  Hz, 1H, H<sub>13</sub>), 3.84 (s, 6H, H<sub>7-OMe</sub> and H<sub>7'-OMe</sub>), 4.85 (d,  $J = 2.1$  Hz, 2H, H<sub>11</sub>), 6.10 (s, 2H, H<sub>1</sub>), 6.79 (d,  $J = 1.8$  Hz, 1H, H<sub>6</sub>), 6.83 (d,  $J = 8.1$  Hz, 1H, H<sub>9</sub>), 6.87 (d,  $J = 1.8$  Hz, 1H, H<sub>6'</sub>), 7.08 (d,  $J = 8.4$  Hz, 1H, H<sub>9'</sub>), 7.16 (dd,  $J = 7.8$  and 1.8 Hz, 1H, H<sub>10</sub>), 7.27 (dd,  $J = 8.7$  and 1.8 Hz, 1H, H<sub>10'</sub>), 7.35 (d,  $J = 15.6$  Hz, 2H, H<sub>3</sub> and H<sub>3'</sub>), 7.57 (d,  $J = 15.6$  Hz, 2H, H<sub>4</sub> and H<sub>4'</sub>), 9.65 (s, 1H, H<sub>8'-OH</sub>)
- ✓ **HRMS (ESI) for C<sub>24</sub>H<sub>22</sub>O<sub>6</sub>:** [M+H]<sup>+</sup> calculated 407.1494, found 407.1867 and [M+K]<sup>+</sup> calculated 445.1053, found 445.1531

The physical data (NMR and HRMS) are in agreement with the values reported in the literature [1].

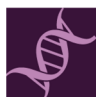

### Characterization of Cur di-alkyne 2

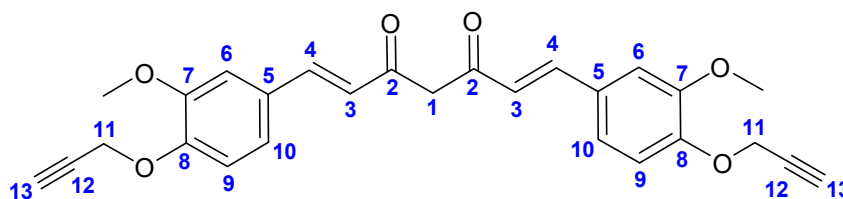

- ✓ **TLC:**  $R_f = 0.72$  (EtOAc/Hexane = 50:50, v/v)
- ✓ **Analytical HPLC:**  $R_t = 13.64$  min (ACN/H<sub>2</sub>O, v/v) gradients from 10/90 to 100/0 in 25 min, then 100/0 for 10 min containing 0.1 % trifluoroacetic acid (TFA). A flow rate of 1.0 mL/min with UV detection at 254 nm and 420 nm.)
- ✓ **<sup>1</sup>H NMR (300 MHz, DMSO-*d*<sub>6</sub>):**  $\delta$  3.59 (t,  $J = 2.1$  Hz, 2H, H<sub>13</sub>), 3.85 (s, 6H, H<sub>7-OMe</sub>), 4.86 (d,  $J = 2.1$  Hz, 4H, H<sub>11</sub>), 6.13 (s, 2H, H<sub>1</sub>), 6.84 (d,  $J = 1.5$  Hz, 2H, H<sub>6</sub>), 6.95 (d,  $J = 7.9$  Hz, 2H, H<sub>9</sub>), 7.19 (dd,  $J = 8.1$  and 1.5 Hz, 2H, H<sub>10</sub>), 7.37 (d,  $J = 16.0$  Hz, 2H, H<sub>3</sub>), 7.60 (d,  $J = 16.0$  Hz, 2H, H<sub>4</sub>)
- ✓ **HRMS (ESI) for C<sub>27</sub>H<sub>24</sub>O<sub>6</sub>:** [M+H]<sup>+</sup> calculated 445.1651, found 445.1962 and [M+K]<sup>+</sup> calculated 483.1209, found 483.1643

The physical data (NMR and HRMS) are in agreement with the values reported in the literature [1].



1D and 2D NMR spectra ( $^1\text{H}$ ,  $^{13}\text{C}$ , HSQC and HMBC) of  $\beta\text{-CD@Cur 4}$  nanoconjugate

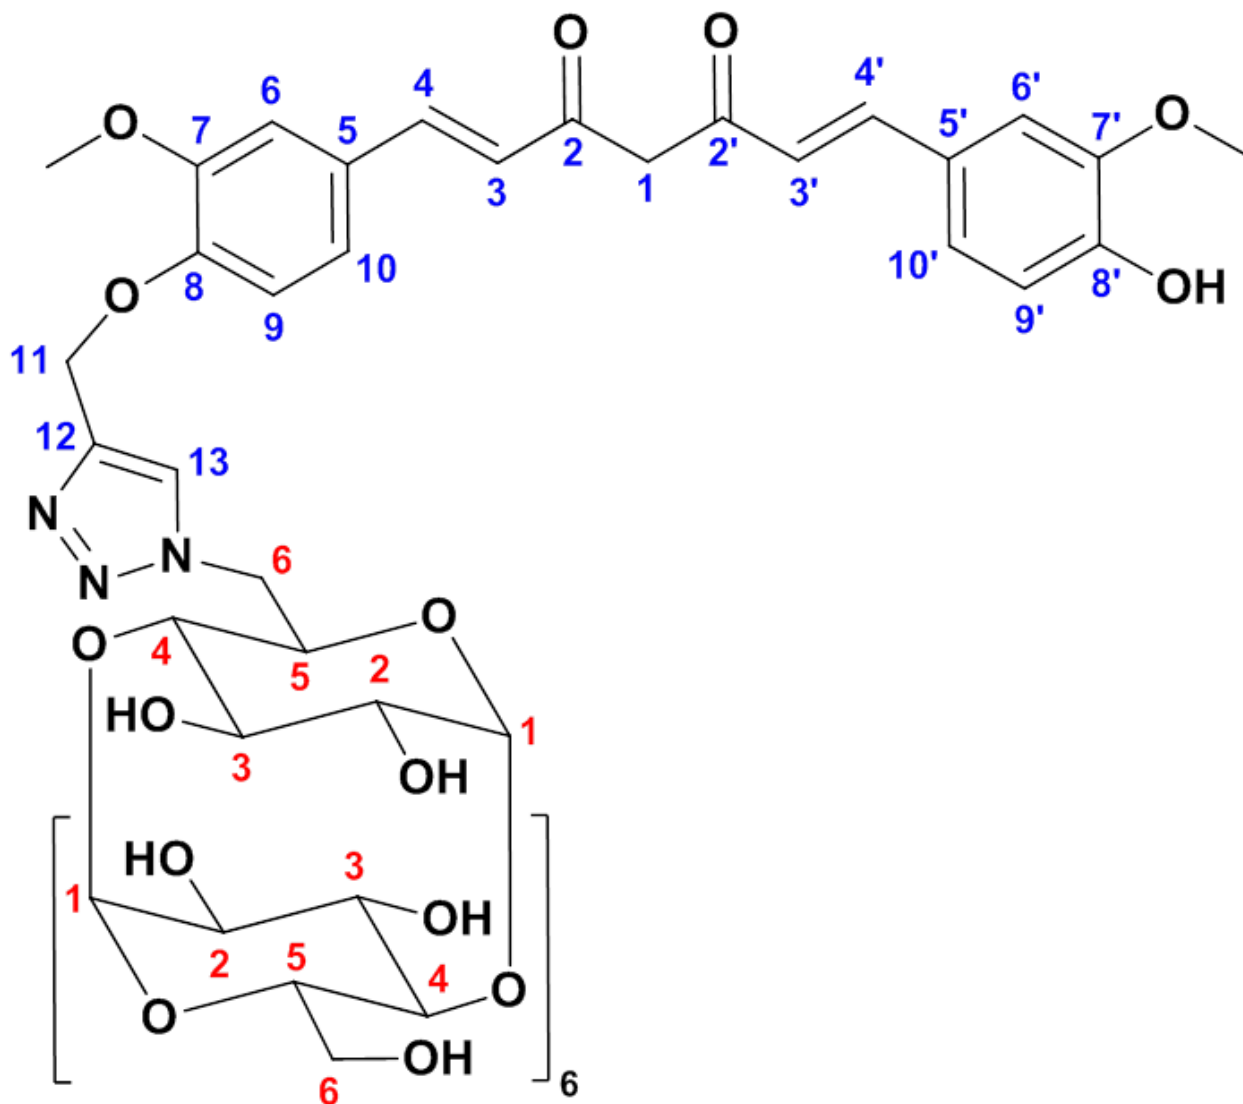

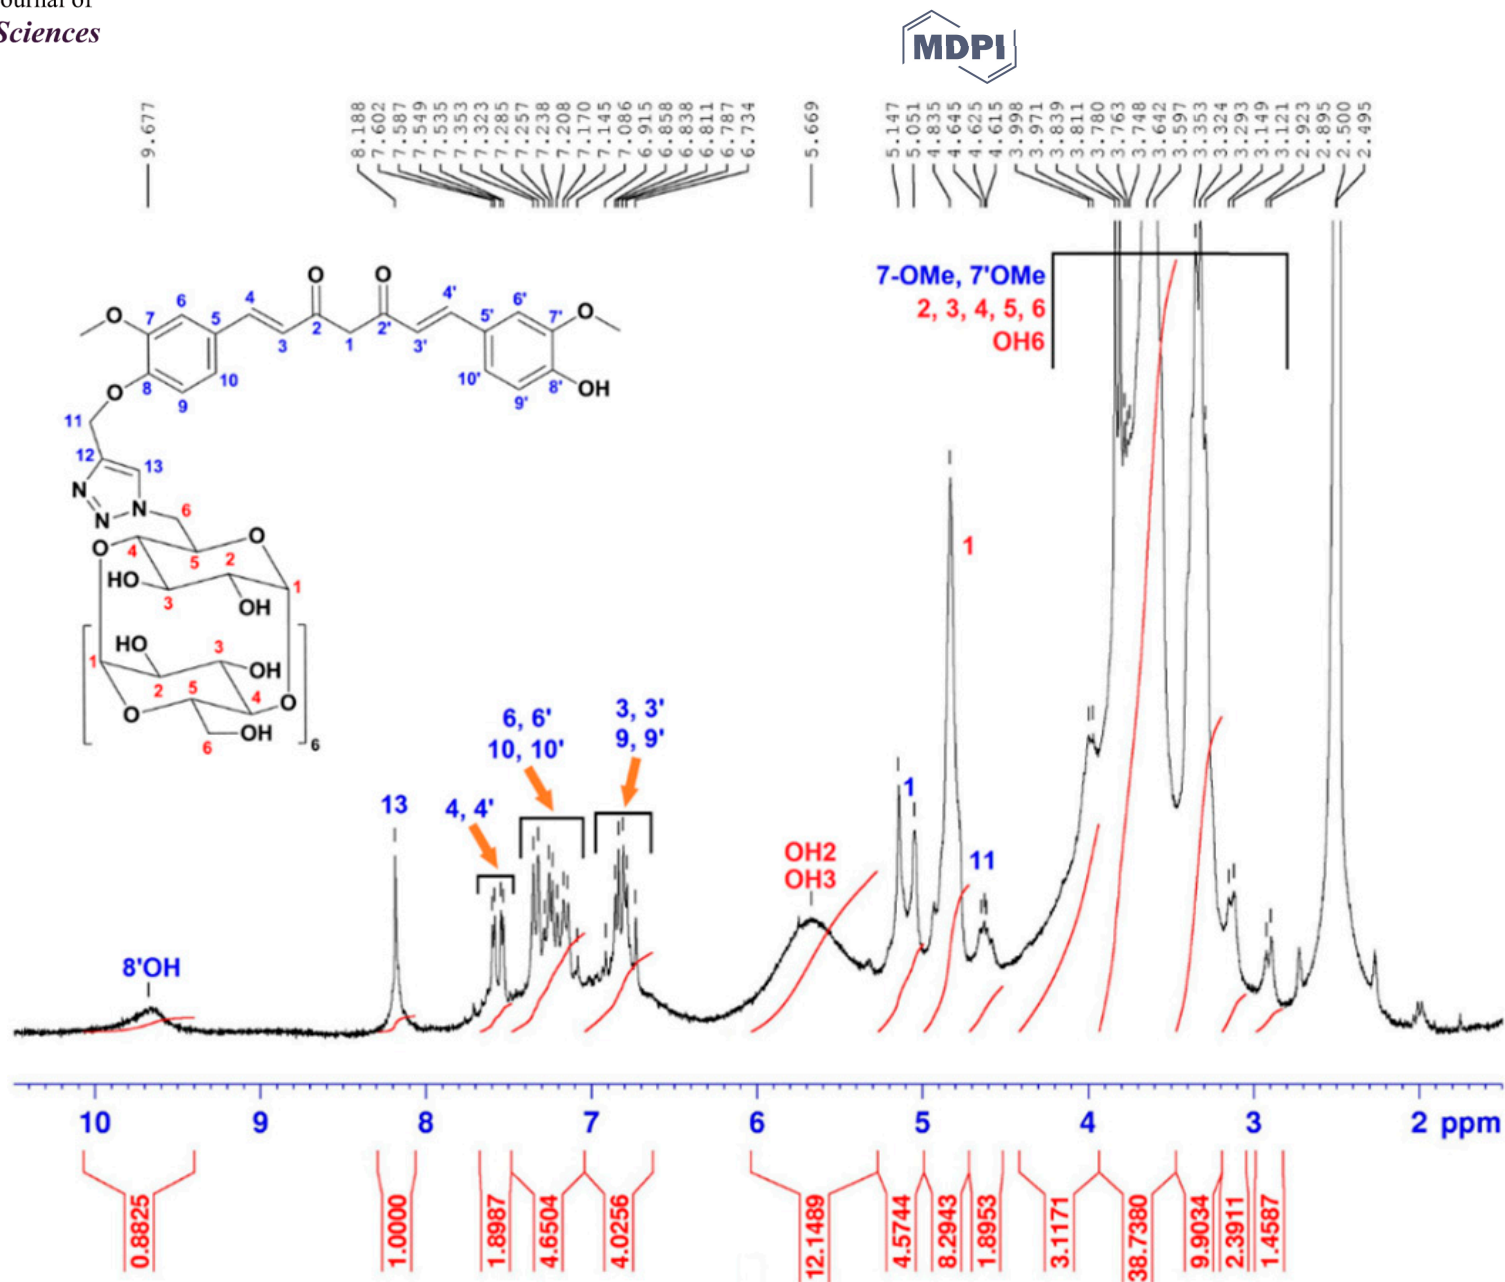

Figure S1.  $^1\text{H}$  NMR spectrum (300 MHz,  $\text{DMSO-}d_6$ , 298K) of  $\beta\text{-CD@Cur 4}$  nanoconjugate.

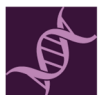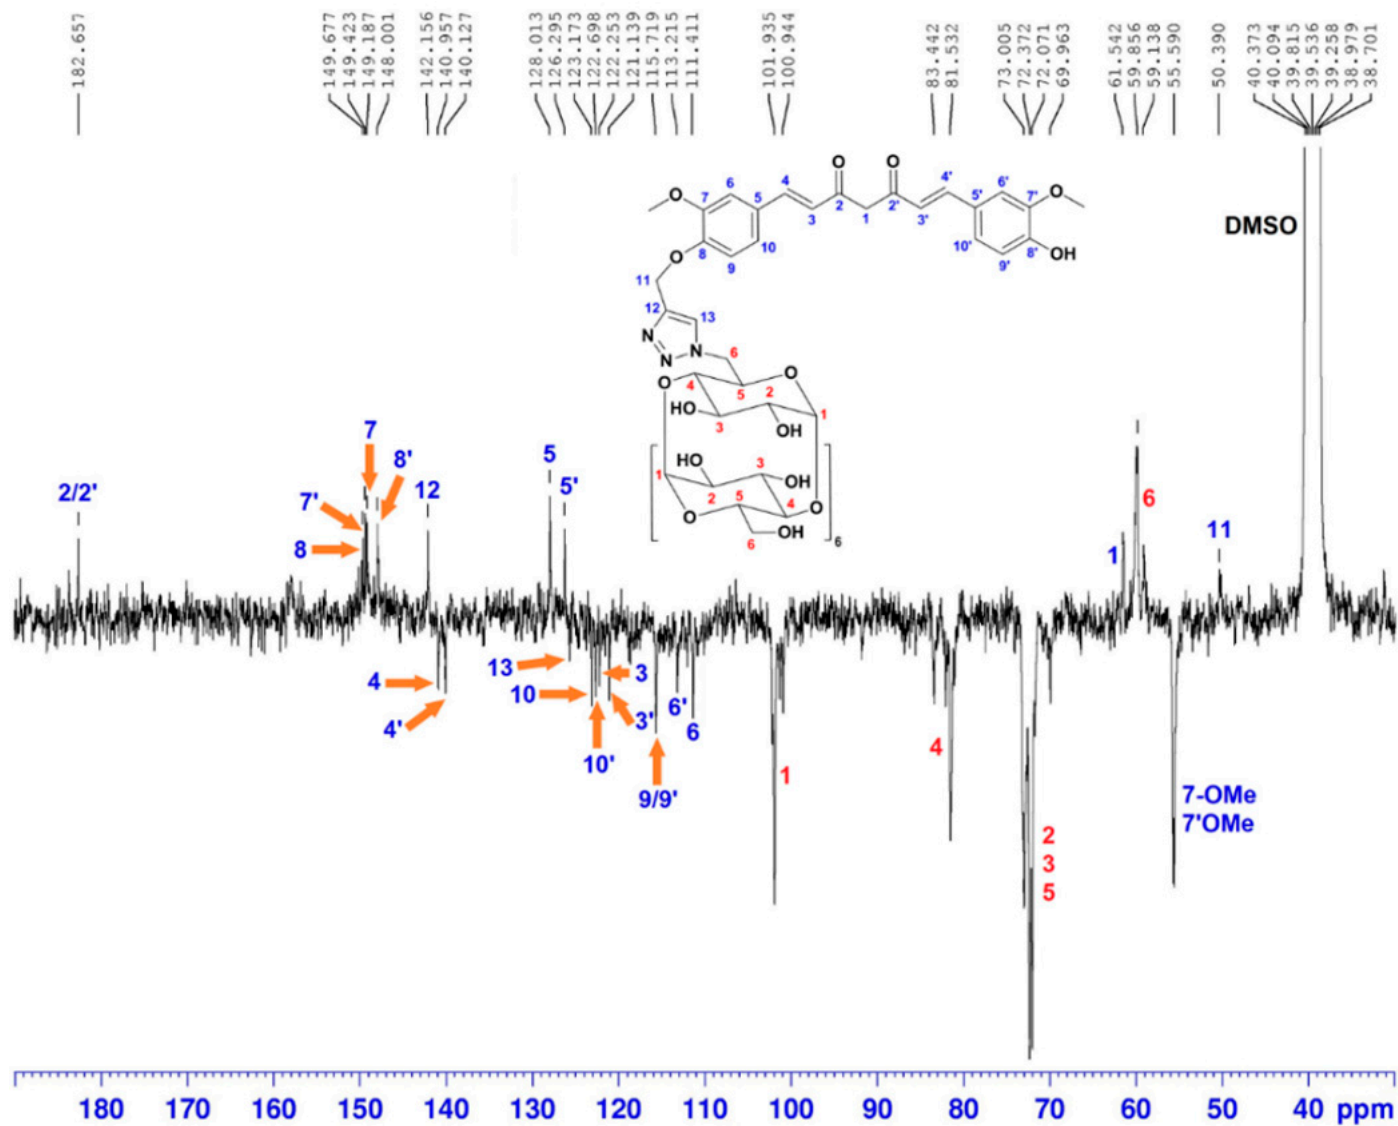

Figure S2. *J* mod  $^{13}\text{C}$  NMR spectrum (75 MHz,  $\text{DMSO-}d_6$ , 298K) of  $\beta\text{-CD@Cur 4}$  nanoconjugate (C and  $\text{CH}_2$  up;  $\text{CH}_3$  and CH down).

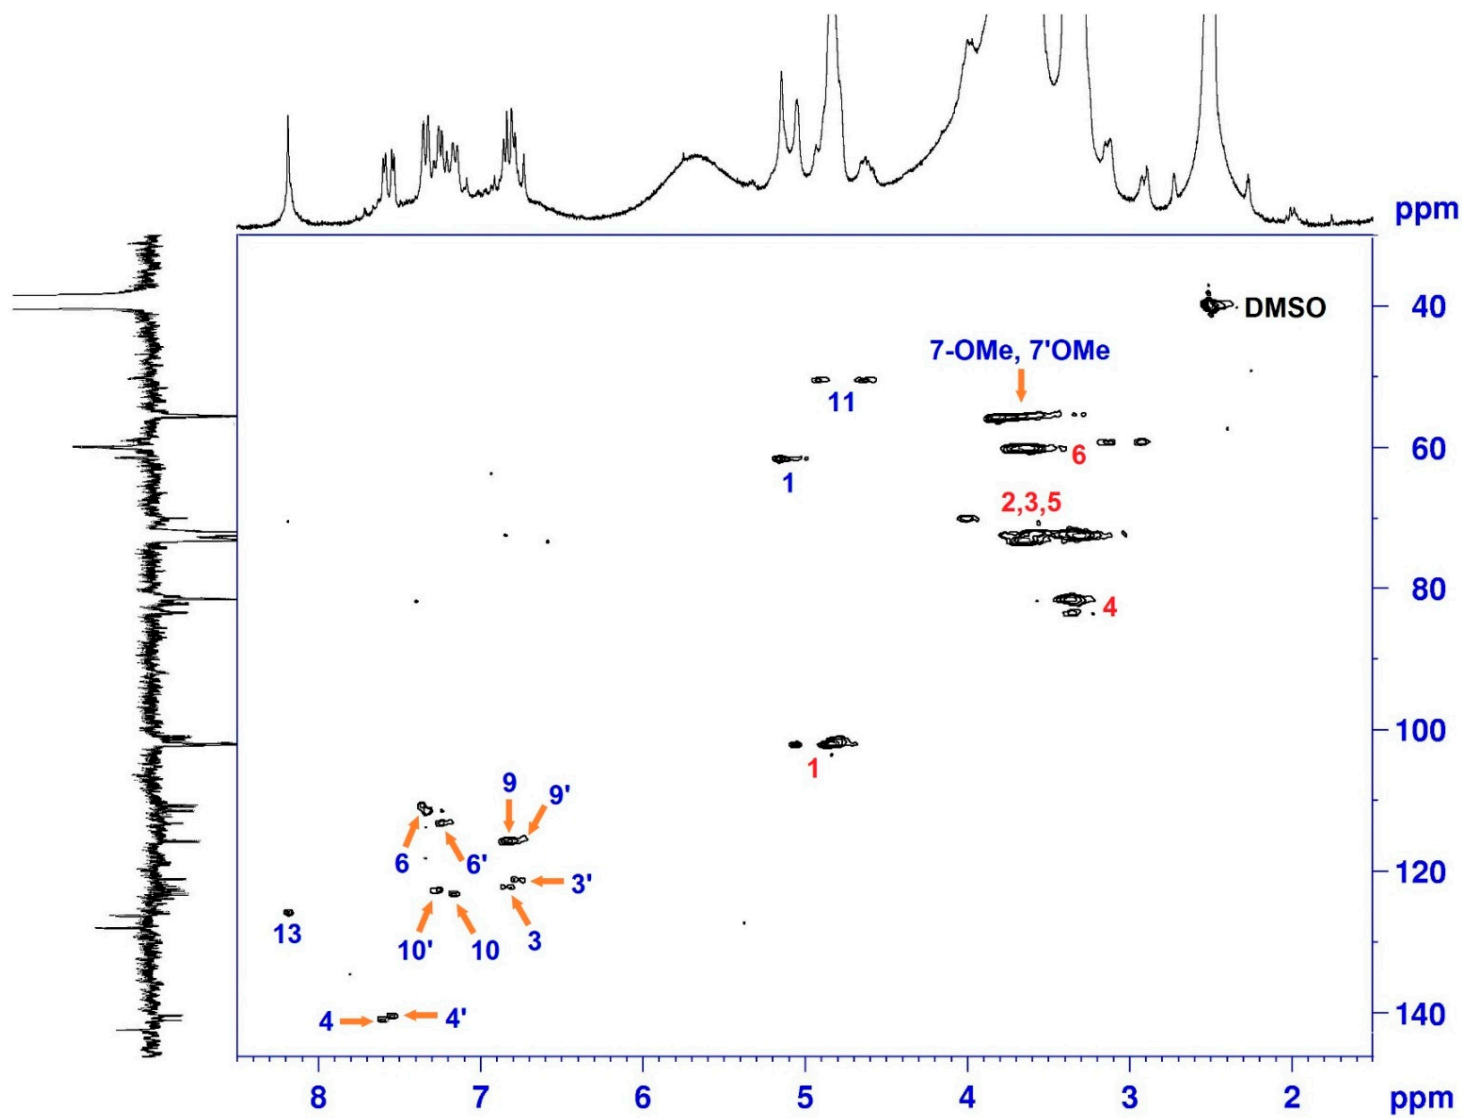

Figure S3. 2D HSQC NMR spectrum (300 MHz, DMSO-*d*<sub>6</sub>, 298K) of  $\beta$ -CD@Cur 4 nanoconjugate.

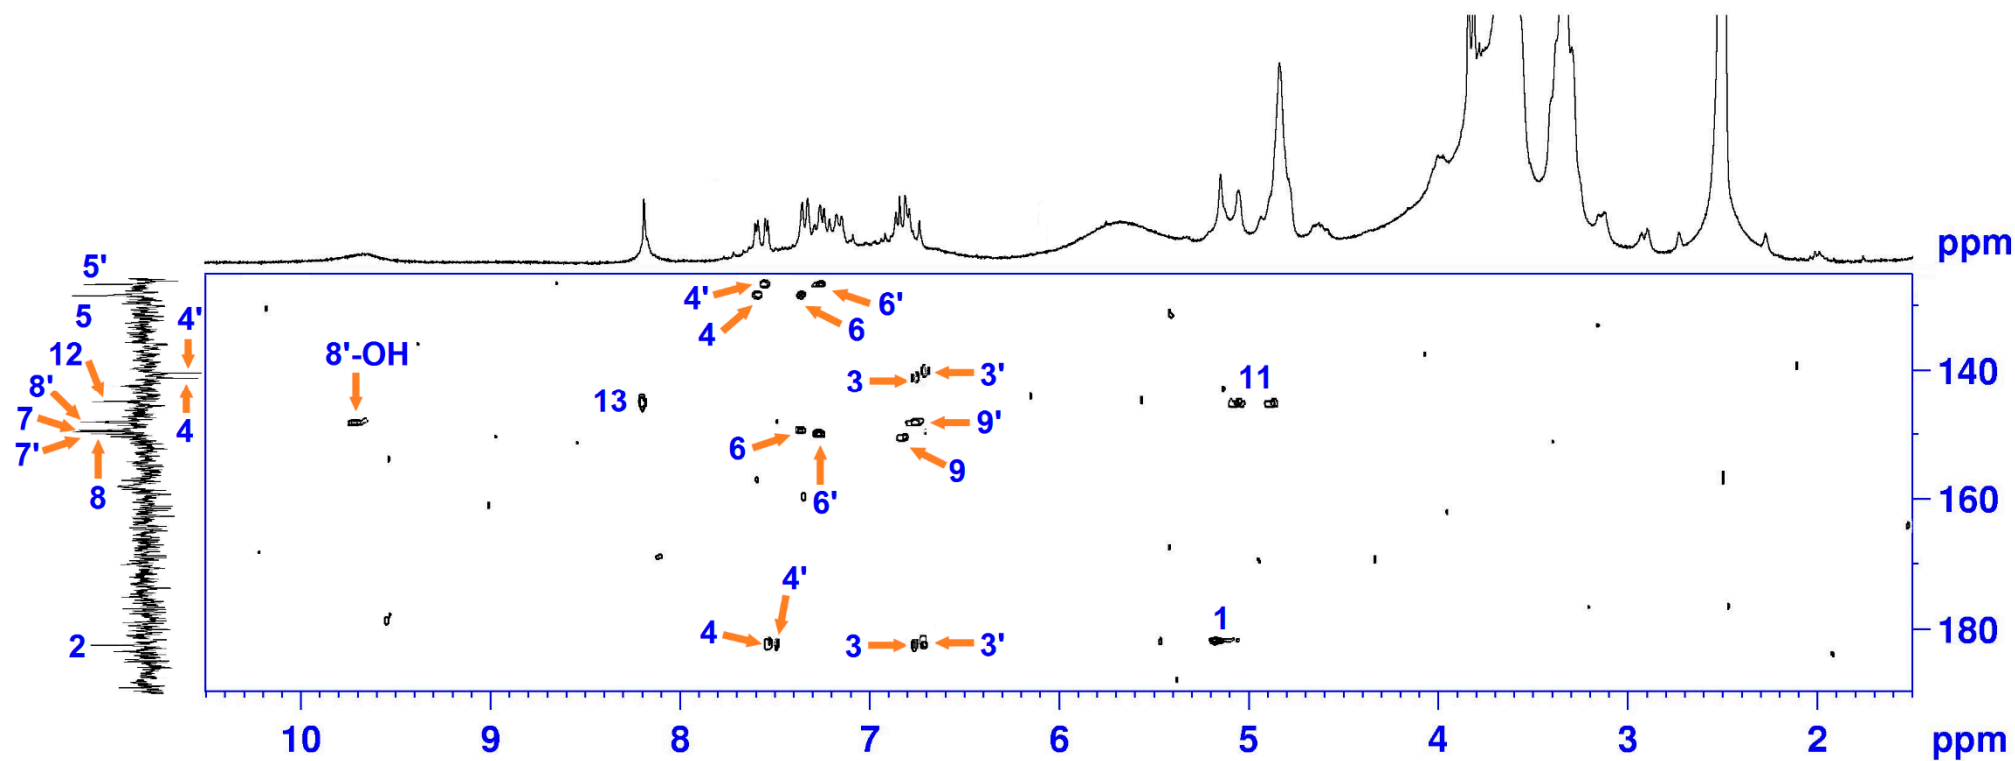

Figure S4. 2D HMBC NMR spectrum (300 MHz,  $\text{DMSO-}d_6$ , 298K) of  $\beta$ -CD@Cur 4 nanoconjugate.





1D and 2D NMR spectra ( $^1\text{H}$ ,  $^{13}\text{C}$ , HSQC and HMBC) of  $(\beta\text{-CD})_2\text{@Cur 5}$  nanoconjugate

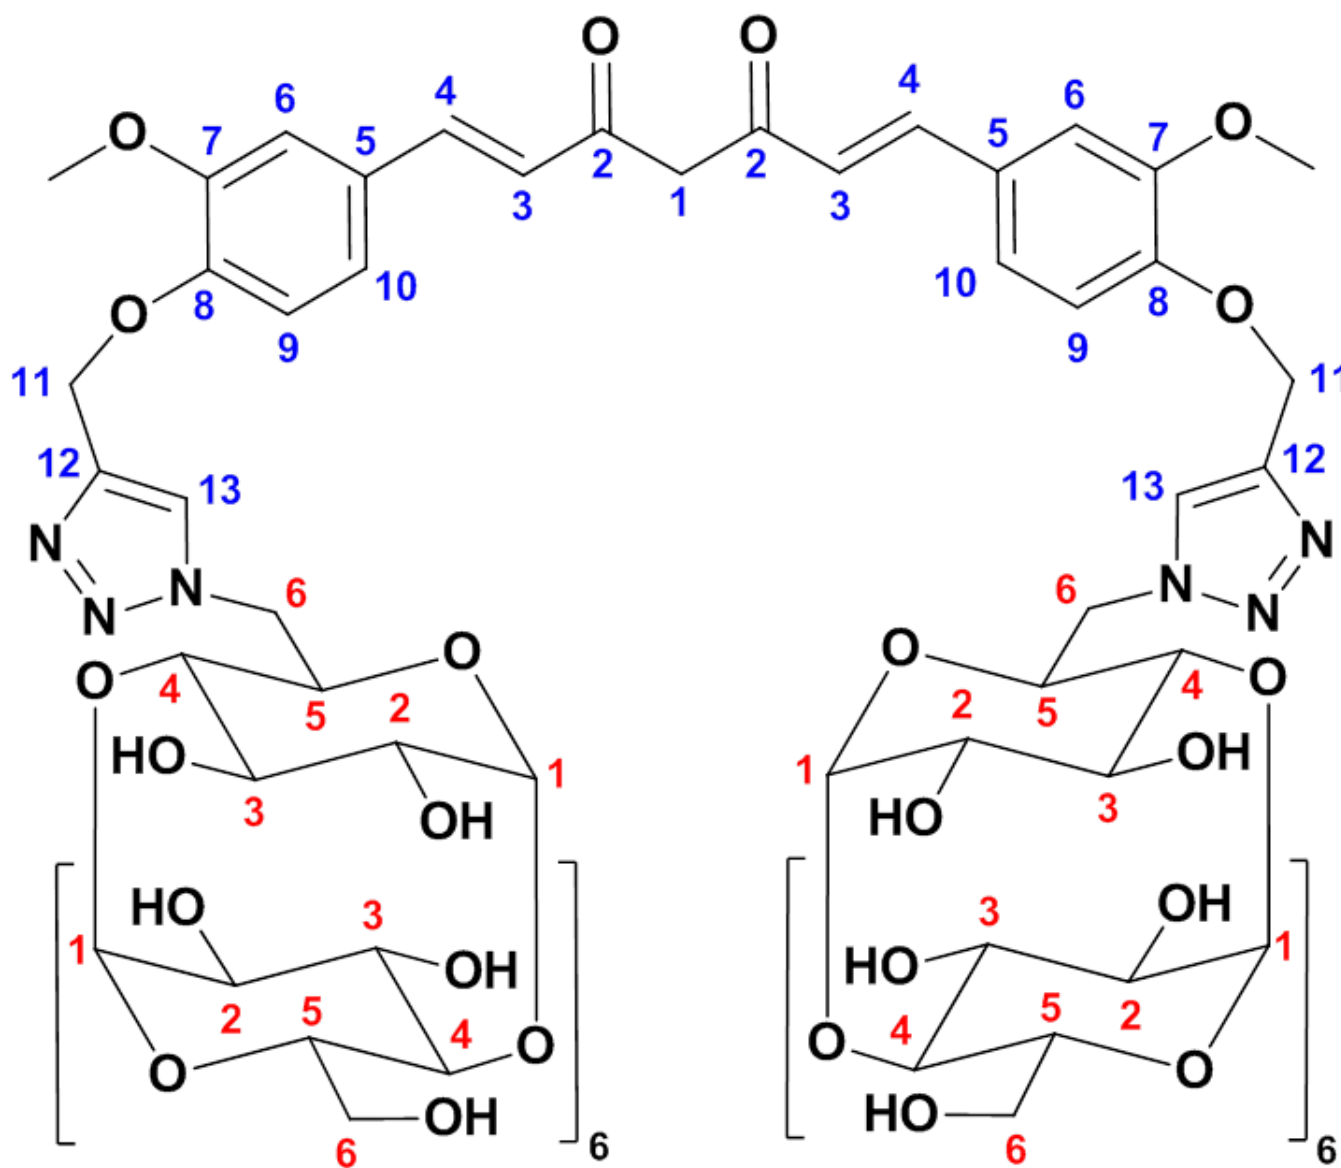

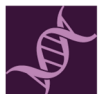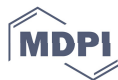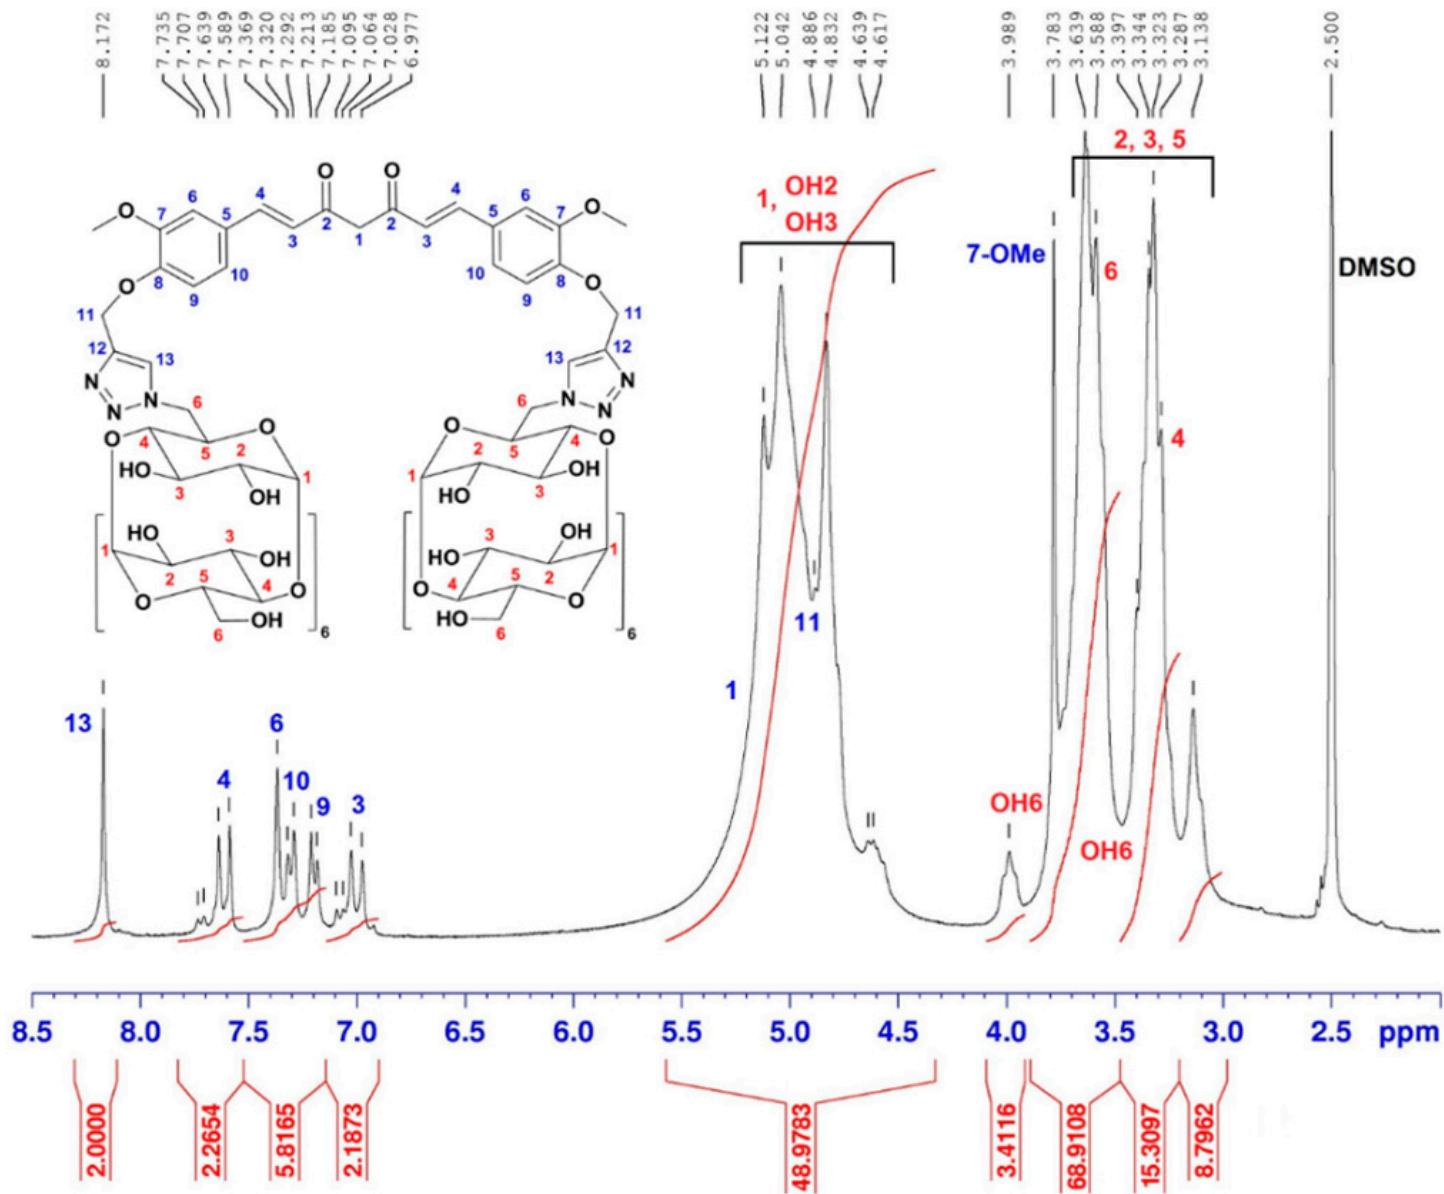

Figure S5.  $^1\text{H}$  NMR spectrum (300 MHz,  $\text{DMSO-}d_6$ , 298K) of  $(\beta\text{-CD})_2@Cur\ 5$  nanoconjugate.

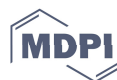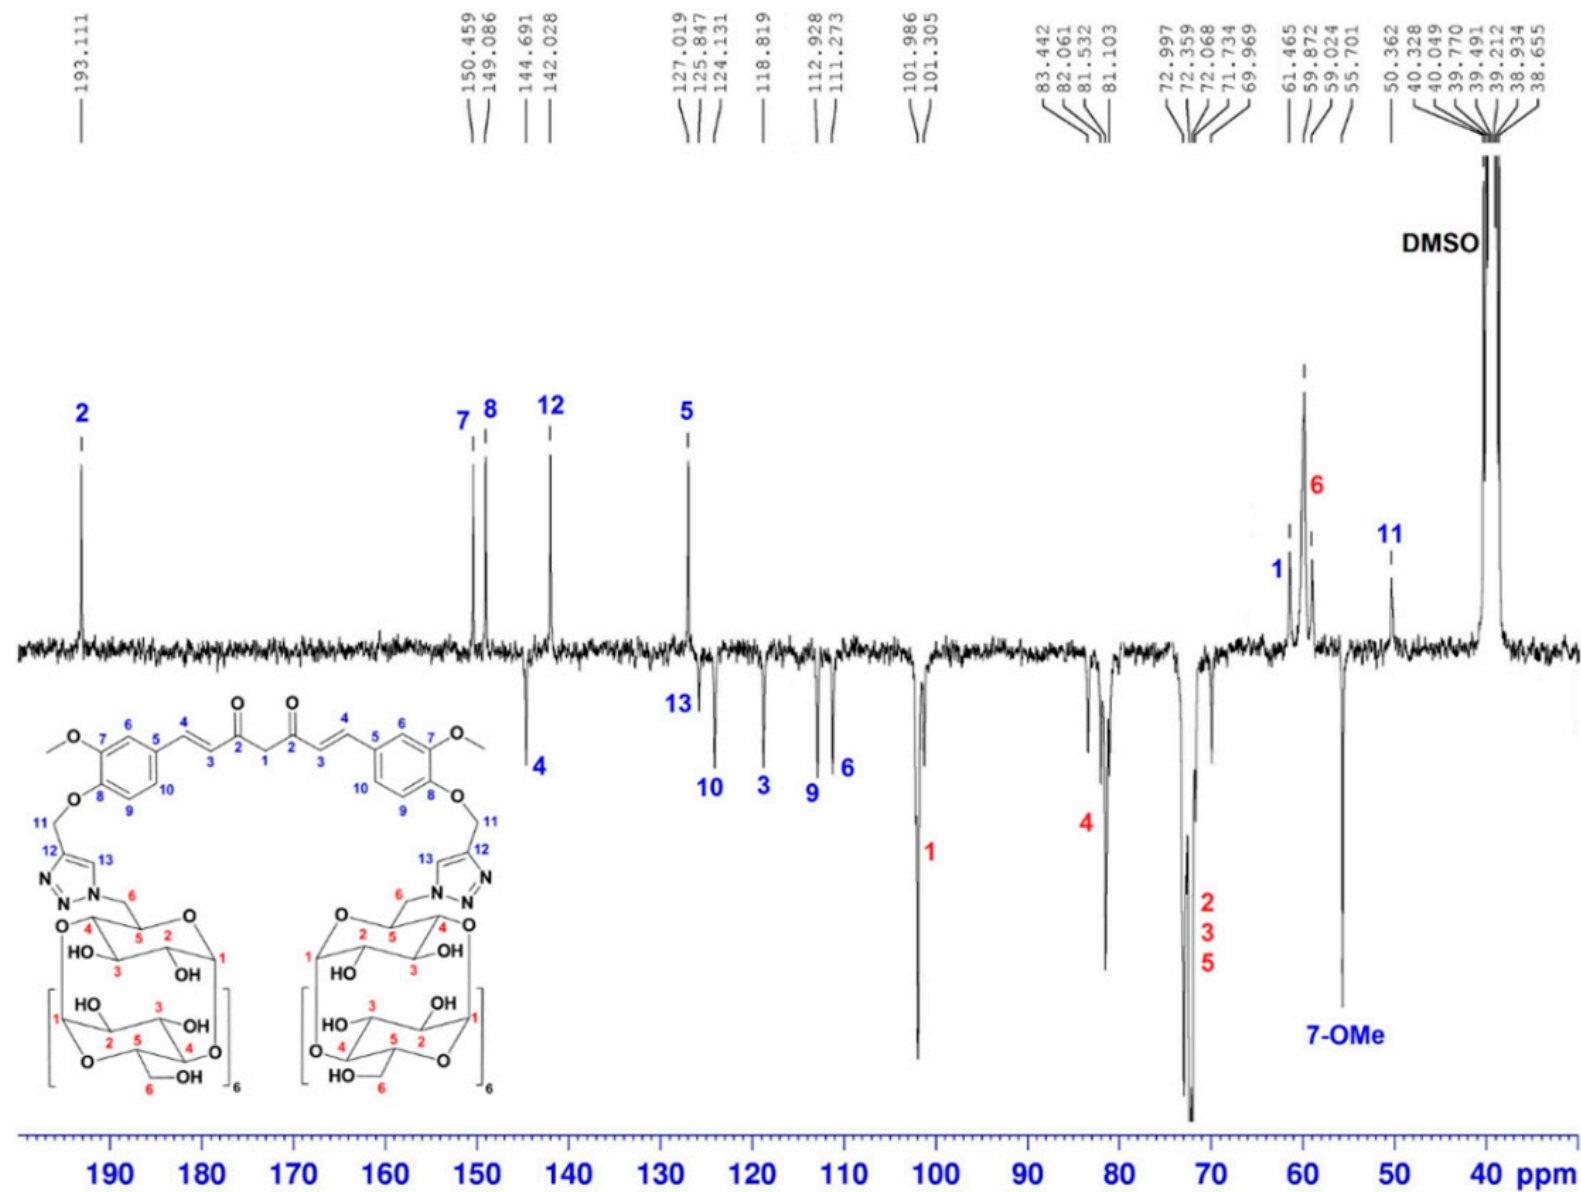

Figure S6. *J* mod  $^{13}\text{C}$  NMR spectrum (75 MHz,  $\text{DMSO-}d_6$ , 298K) of  $(\beta\text{-CD})_2@$ Cur 5 nanoconjugate (C and  $\text{CH}_2$  up;  $\text{CH}_3$  and CH down).

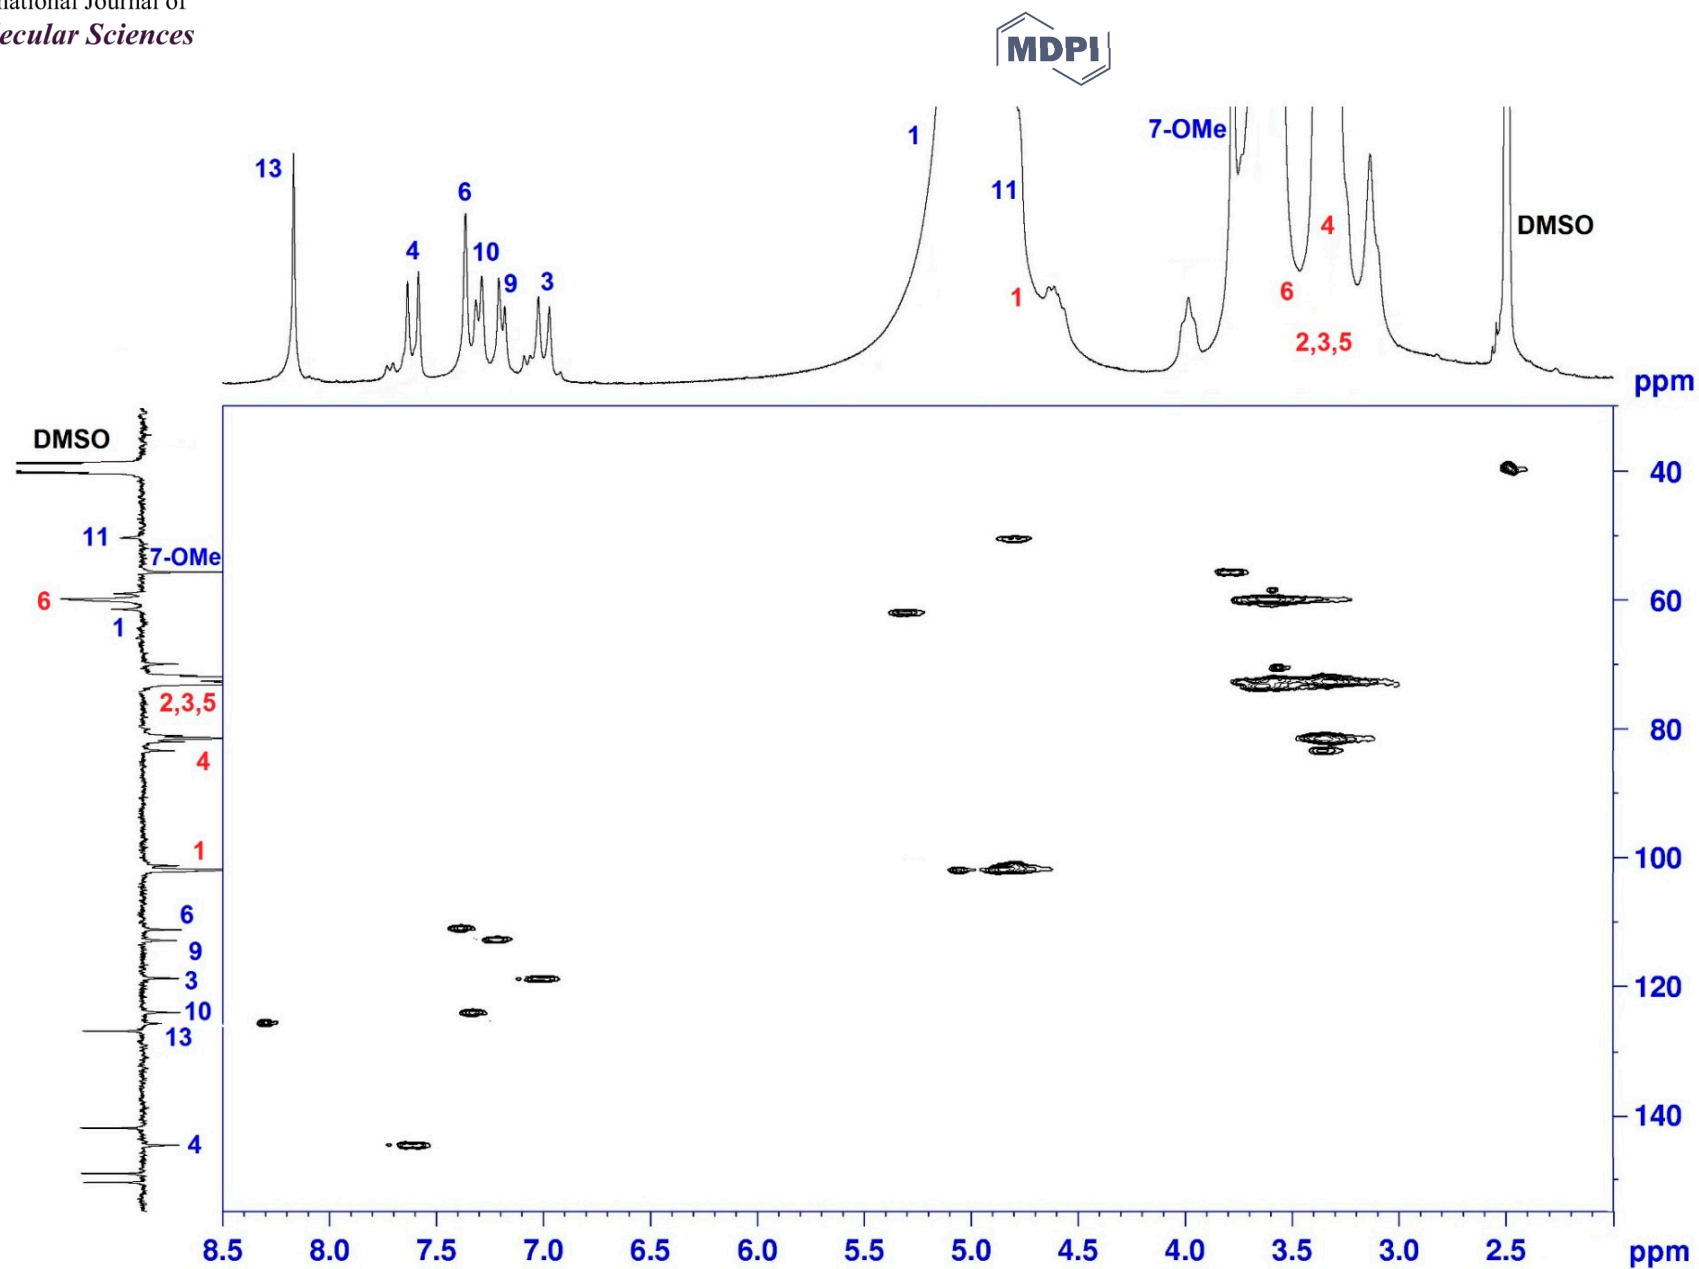

Figure S7. 2D HSQC NMR spectrum (300 MHz,  $\text{DMSO-}d_6$ , 298K) of  $(\beta\text{-CD})_2@Cur\ 5$  nanoconjugate.

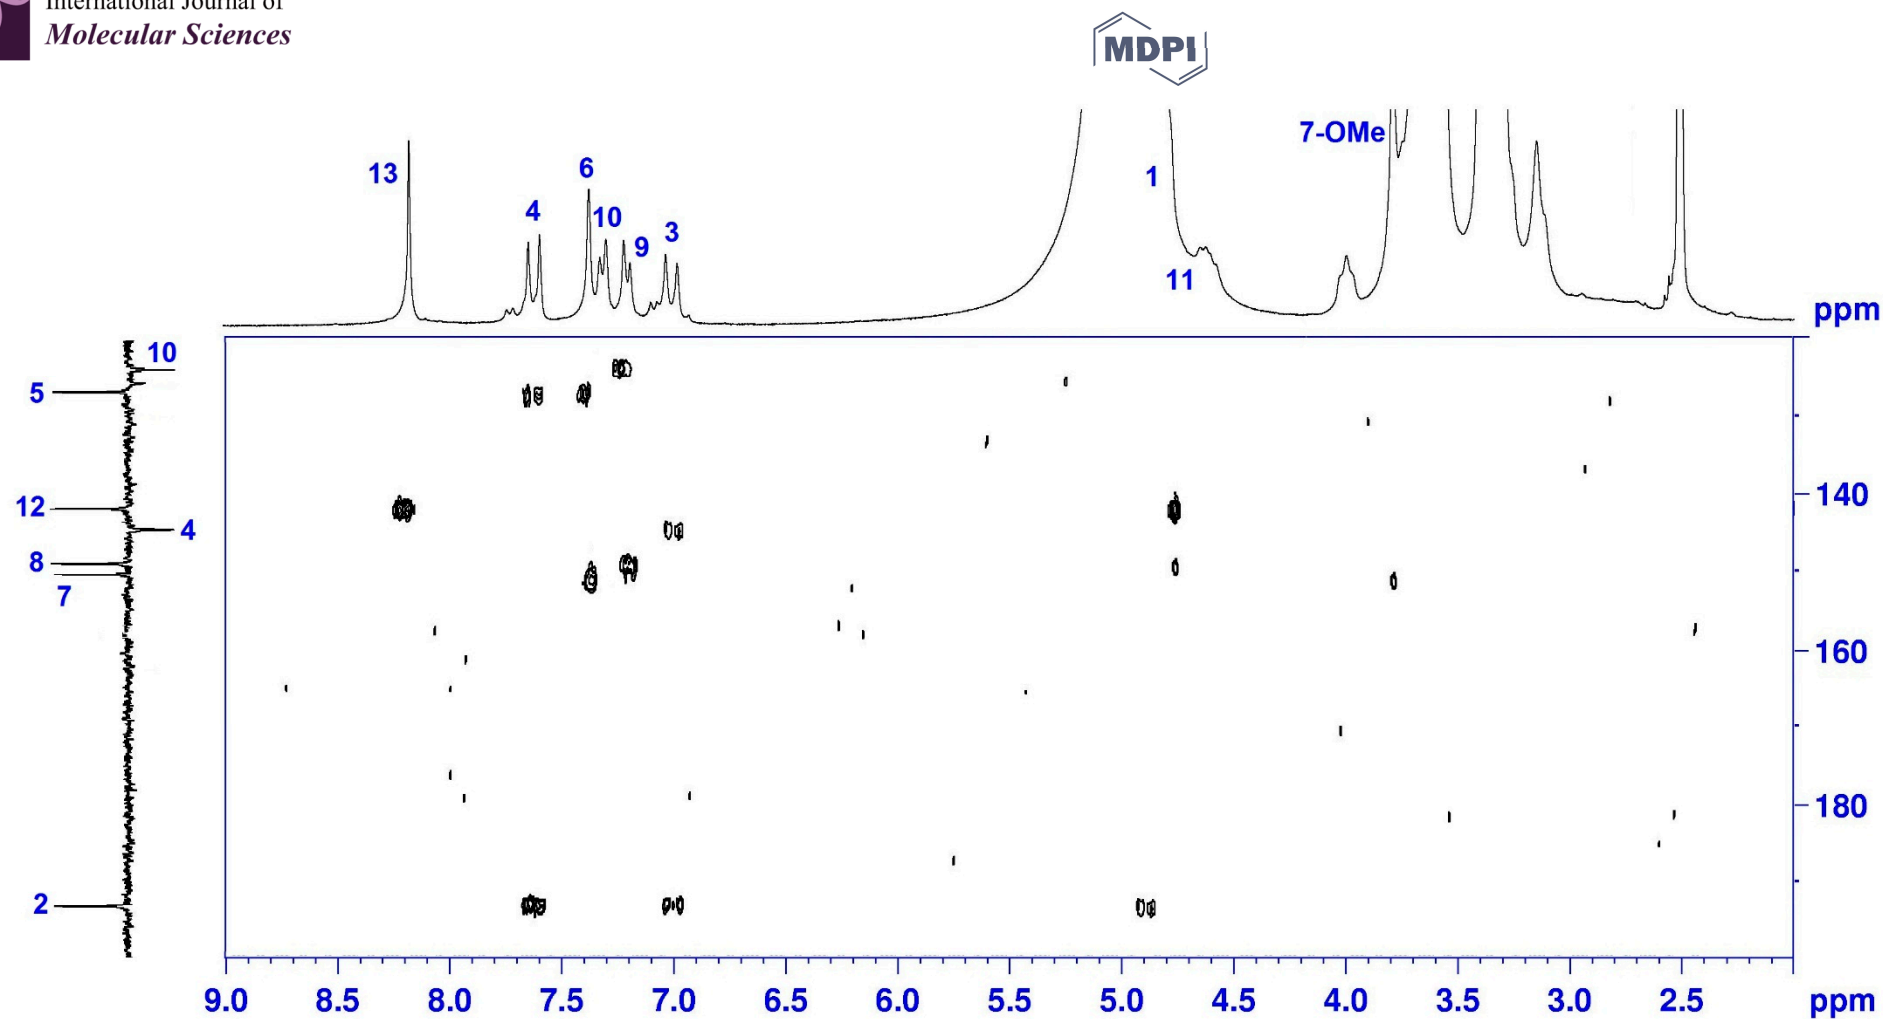

Figure S8. 2D HMBC NMR spectrum (300 MHz, DMSO-*d*<sub>6</sub>, 298K) of (β-CD)<sub>2</sub>@Cur 5 nanoconjugate.

## References

1. Raja, K.; Alonso, A.; Banerjee, P.; Dolai, S.; Corbo, C.; Averick, S.; Mogha, A.; Debnath, S. Curcumin derivatives. WO2011106691A2.2011.  
<https://patentimages.storage.googleapis.com/44/6a/79/e7561b802ebbd8/WO2011106691A2.pdf>
